# The Natural History of Vision-Related Quality of Life after Unilateral Occipital Stroke

Running title: Quality of life in Cortical Blindness

Neil Dogra<sup>1</sup>, Bryan V. Redmond<sup>1</sup>, Selena Lilley<sup>1</sup>, Brent A. Johnson<sup>2</sup>, Byron L. Lam<sup>3</sup>, Madhura Tamhankar<sup>4</sup>, Steven E. Feldon<sup>1</sup>, Berkeley Fahrenthold<sup>1</sup>, Jingyi Yang<sup>1</sup>, Krystel R. Huxlin<sup>1#</sup> and Matthew R. Cavanaugh<sup>1#</sup>

*# Equal senior authors*

<sup>1</sup>*Dept. Ophthalmology, Flaum Eye Institute and Center for Visual Science, University of Rochester, Rochester, NY USA*

<sup>2</sup>*Dept. of Biostatistics and Computational Biology, University of Rochester, Rochester NY, USA*

<sup>3</sup>*Scheie Eye Institute, University of Pennsylvania, Philadelphia PA, USA*

<sup>4</sup>*Bascom Palmer Eye Institute, University of Miami, Miami FL, USA*

**Correspondence:** Krystel Huxlin, Ph.D., ORCID:0000-0001-7138-6156; Flaum Eye Institute, University of Rochester Medical Center, 601 Elmwood Ave. Box 314, Rochester NY 14642, USA. Email: [khuxlin@ur.rochester.edu](mailto:khuxlin@ur.rochester.edu)

## Acknowledgements

The authors would like to thank Adin Reisner, Lisa Blanchard, Chrys Callan for their assistance in recruiting and screening patients for the studies reported. We also thank Terrance Schaefer and Rachel Hollar for performing the HVF testing on these patients and Dr. Brent Johnson for advice on statistical analyses.

**Data Availability:** The data that support the findings of this study are available from the corresponding author upon reasonable request.

27 **Funding:** National Eye Institute and Office of Behavioral and Social Sciences Research (R01  
28 EY027314, R01 EY027314-05S1 Research Supplement to Promote Diversity in Health-Related  
29 Research Program, R01 EY027314-05S2 Administrative Supplement, P30 EY001319 and T32  
30 EY007125 to the Center for Visual Science); Research to Prevent Blindness (Unrestricted Grant  
31 to the Department of Ophthalmology); Center of Emerging and Innovative Science for Empire  
32 State Development (project no.: 1730C004); the Center of Excellence (project no: 1689bC2).

33

34 **Conflict of Interest:** All authors report no conflicts of interest for the present study.

35

36 **Ethics Approval and Patient Consent:** Clinical procedures for the present study were  
37 approved by the Western Institutional Review Board for patients enrolled in clinical trial  
38 NCT03350919 (WIRB#1181904) and by the Research Subject Review Board at the University  
39 of Rochester for NCT04798924 and NCT05098236. All procedures complied with the tenets of  
40 the Declaration of Helsinki and were conducted after receiving written, informed consent from  
41 each participant.

42

43 **Author Contacts:** Neil Dogra - [ndogra@u.rochester.edu](mailto:ndogra@u.rochester.edu)

44 Bryan V. Redmond - [bryan\\_redmond@urmc.rochester.edu](mailto:bryan_redmond@urmc.rochester.edu)

45 Selena Lilley - [selenaklilley@gmail.com](mailto:selenaklilley@gmail.com)

46 Brent A. Johnson - [brent\\_johnson@urmc.rochester.edu](mailto:brent_johnson@urmc.rochester.edu)

47 Byron L. Lam - [blam@med.miami.edu](mailto:blam@med.miami.edu)

48 Madhura Tamhankar - [madhura.tamhankar@penntamhankar.upenn.edu](mailto:madhura.tamhankar@penntamhankar.upenn.edu)

49 Steven E. Feldon - [steven\\_feldon@urmc.rochester.edu](mailto:steven_feldon@urmc.rochester.edu)

50 Berkeley Fahrenthold - [berkeley\\_fahrenthold@urmc.rochester.edu](mailto:berkeley_fahrenthold@urmc.rochester.edu)

51 Jingyi Yang - [jingyi\\_yang@urmc.rochester.edu](mailto:jingyi_yang@urmc.rochester.edu)

52 Krystel R. Huxlin - [khuxlin@ur.rochester.edu](mailto:khuxlin@ur.rochester.edu)

53 Matthew R. Cavanaugh - [matthew\\_cavanaugh@urmc.rochester.edu](mailto:matthew_cavanaugh@urmc.rochester.edu)

54 **Abstract**

55 **Background/Objectives:** Stroke damage to the primary visual cortex induces large,  
56 homonymous visual field defects that impair daily living. Here, we asked if vision-related quality  
57 of life (V-QoL) is impacted by time since stroke.

58 **Subjects/Methods:** We conducted a retrospective meta-analysis of 95 occipital stroke patients  
59 (F/M=26/69, 27-78 years old, 0.5 to 373.5 months post-stroke) in whom V-QoL was estimated  
60 using the National Eye Institute Visual Functioning Questionnaire (NEI-VFQ) and its 10-item  
61 neuro-ophthalmic supplement (Neuro10). Visual deficit severity was represented by the  
62 Perimetric Mean Deviation (PMD) calculated from 24-2 Humphrey visual fields. Data were  
63 compared with published cohorts of visually-intact controls. The relationship between V-QoL and  
64 time post-stroke was assessed across participants, adjusting for deficit severity and age with a  
65 multiple linear regression analysis.

66 **Results:** Occipital stroke patients had significantly lower NEI-VFQ and Neuro10 composite  
67 scores than controls. All subscale scores describing specific aspects of visual ability and  
68 functioning were impaired except for ocular pain and general health, which did not differ  
69 significantly from controls. Surprisingly, visual deficit severity was not correlated with either  
70 composite score, both of which increased with time post-stroke, even when adjusting for PMD  
71 and age.

72 **Conclusions:** V-QoL appears to improve with time post-occipital stroke, irrespective of visual  
73 deficit size or patient age at insult. This may reflect the natural development of compensatory  
74 strategies and lifestyle adjustments. Thus, future studies examining the impact of rehabilitation  
75 on daily living in this patient population should consider the possibility that their V-QoL may  
76 change gradually over time, even without therapeutic intervention.

77

78 **Keywords:** Stroke, Quality of Life, Cortical Blindness

## 79 **Introduction**

80 Occipital stroke is the leading source of damage to the human primary visual cortex (V1; Zhang,  
81 Kedar, Lynn, Newman, & Biousse, 2006), causing a loss of conscious vision over similar  
82 portions of the visual field through both eyes (Gilhotra, Mitchell, Healey, Cumming, & Currie,  
83 2002; Pollock et al., 2012; Pollock et al., 2011). This condition is known by many names but in  
84 this manuscript, it will be referred to as cortically-induced blindness (CB). It affects a significant  
85 portion of stroke survivors, with an estimated 1% of the population over age 49 years likely to  
86 develop CB in their lifetime (Gilhotra et al., 2002), and ~100,000 new cases each year in the US  
87 and Europe (Gray et al., 1989; Pollock et al., 2012; Pollock et al., 2011; Rowe, 2013; Sahraie,  
88 2007).

89         Activities of daily living including reading, driving, navigation, and autonomy are severely  
90 impaired in CB (Dombovy, Sandok, & Basford, 1986; Jones & Shinton, 2006; Jongbloed, 1986).  
91 Until recently, this vision loss was considered irreversible, with most patients discharged without  
92 rehabilitation opportunities (Horton, 2005a, 2005b; Plant, 2005; Pollock et al., 2019; Reinhard et  
93 al., 2005). As a result, there is little follow-up or monitoring of progression in CB, despite its  
94 significant impact on visual quality of life (V-QoL). However, accumulating experimental  
95 evidence suggests that visual training can recover a range of perceptual abilities within CB  
96 fields (for review, see Liu, Hanly, Fahey, Fong, & Bye, 2019; Melnick, Tadin, & Huxlin, 2016;  
97 Saionz, Busza, & Huxlin, 2022; Saionz, Feldon, & Huxlin, 2020). As restoration therapies  
98 targeting CB continue to develop, a better understanding of the natural evolution of V-QoL and  
99 the major factors driving these changes is essential to correctly interpret the impact of both the  
100 condition, and its rehabilitation, on daily living.

101         The National Eye Institute Visual Functioning Questionnaire (NEI-VFQ) is a clinically  
102 validated, self-administered survey that has been extensively used to evaluate V-QoL in CB  
103 patients (Chen et al., 2009; Gall, Franke, & Sabel, 2010; Gall, Lucklum, Sabel, & Franke, 2009;  
104 George, Hayes, Chen, & Crotty, 2011; Papageorgiou et al., 2007; Rowe et al., 2019). It asks

105 respondents to assess difficulties they face with vision-specific functioning in contexts that  
106 include social gatherings, workplace performance, and pursuit of personal hobbies (Mangione,  
107 et al., 2001; Mangione et al., 1998). Responses from the questionnaire are used to assign  
108 numeric scores to 12 subscales: general health, general vision, ocular pain, near activities,  
109 distance activities, social functioning, mental health, role difficulties, dependency, driving, color  
110 vision, and peripheral vision. A composite score describing overall V-QoL is then generated by  
111 averaging all subscale scores except for general health. The NEI-VFQ can also be administered  
112 with a 10-item neuro-ophthalmic supplement (Neuro10), which generates an independent,  
113 composite score describing neuro-ophthalmic functions (Raphael et al., 2006). All scores scale  
114 from 0 to 100, with higher scores indicating better functioning.

115 One prior study found lower NEI-VFQ composite scores in 33 patients with stroke-  
116 induced V1 damage compared to a control group of healthy subjects (Papageorgiou et al.,  
117 2007). The authors reported that time since stroke and visual deficit severity did not affect NEI-  
118 VFQ scores, but only patients in the chronic phase ( $\geq 6$  months) post-stroke were included  
119 (Papageorgiou et al., 2007). Similar findings were reported in another sample of 177 first-ever,  
120 chronic stroke patients (Gall et al., 2010). Finally, a study that included both acute and sub-  
121 acute patients (n=66) reported a large impact of deficit severity on V-QoL, but did not assess  
122 the effect of time-post stroke (Tharaldsen et al., 2020). Here, we examined V-QoL in 95 CB  
123 patients with V1 damage from a single etiology (occipital stroke), and in the absence of any  
124 therapeutic intervention for their vision loss. Our goal was to assess if V-QoL differed for  
125 patients <1 month to several years post-stroke. We also gauged the relative influence of deficit  
126 size/severity and participant age on this natural history. Finally, by examining individual  
127 subscale scores, we asked which aspects of visual or social functioning drove observed  
128 differences.

129

## 130 **Methods**

### 131 **Participants**

132 We conducted a retrospective, meta-analysis of V-QoL data from 95 patients with homonymous  
133 vision loss from stroke-induced damage to the occipital cortex, confirmed by magnetic  
134 resonance imaging or computed tomography (**Fig. 1A**). Patients were enrolled in one of two  
135 vision restoration clinical trials (ClinicalTrials.gov identifiers: NCT04798924, NCT03350919), or  
136 in experimental studies conducted by the Huxlin laboratory (NCT05098236). Exclusion criteria in  
137 all studies were: best-corrected visual acuity worse than 20/40, concurrent use of medications  
138 that might affect test performance, presence of ocular or neurologic condition(s) other than  
139 occipital stroke, which might cause visual impairment or impede study performance. By  
140 including data from 3 different trials, we were able to include a larger number of patients and  
141 times post-stroke than were present in individual studies.

142 V-QoL surveys were collected prior to and in the absence of training or rehabilitative  
143 interventions. CB patients (female/male=26/69) were aged 27-78 (mean±standard  
144 deviation=58±12) years old, and ranged from 0.5 to 373.5 (26.0±55.4) months post-stroke (see  
145 **Supplemental Table 1** for breakdown per NCT). Patient data were compared to two published  
146 reference groups of visually-intact control: one for the National Eye Institute Visual Functioning  
147 Questionnaire (NEI-VFQ) and another for its 10-item neuro-ophthalmic supplement (Neuro10).  
148 The NEI-VFQ reference group consists of 122 visually-intact participants, 59±14 years old  
149 (Mangione et al., 2001); the Neuro10 reference group includes 65 visually-intact controls, 38±12  
150 years old (Raphael et al., 2006). Mean patient age in our CB cohort did not differ significantly  
151 from the NEI-VFQ reference group ( $t_{216}=0.56$ ,  $p=0.578$ ), but the Neuro10 reference group was  
152 significantly younger ( $t_{159}=10.38$ ,  $p<0.0001$ ).

153 Clinical procedures for the present study were approved by the Western Institutional  
154 Review Board for patients enrolled in clinical trial NCT03350919 (WIRB#1181904) and by the  
155 Research Subject Review Board at the University of Rochester for NCT04798924 and

156 NCT05098236. All procedures complied with the tenets of the Declaration of Helsinki and were  
157 conducted after receiving written, informed consent from each participant.

158

### 159 **Quality of Life Measures**

160 The questionnaires administered included the 25-item version of the NEI-VFQ along with its 14-  
161 item appendix, resulting in a total of 39 questions. As per the scoring manual, responses from  
162 the NEI-VFQ were used to compute 12 subscale scores, which were averaged together  
163 (excepting General Health) to generate a composite score of overall V-QoL (Mangione, 2000).  
164 We also administered the 10-item neuro-ophthalmic supplement, which generated an  
165 independent Neuro10 composite score. Patients received a paper copy of the survey and were  
166 instructed to independently complete the questionnaire at our clinical testing sites. Study staff  
167 were present to clarify wording but provided no additional input or assistance.

168

### 169 **Assessment of Visual Field Defect Size and Severity**

170 Relative size and severity of CB visual impairments were estimated using a Humphrey Visual  
171 Field Analyzer II-i at two study sites (87 patients), and a Humphrey Visual Field Analyzer 3 at a  
172 third site (8 patients), with all sites using a 24-2 testing protocol. Patients were presented with  
173 white, Goldman size III stimuli on a white background with a luminance of 11.3 cd/m<sup>2</sup>. Visual  
174 sensitivity thresholds for detecting these light targets were calculated using the Swedish  
175 Interactive Threshold Algorithm (SITA-Standard). Visual acuity was best-corrected to  $\geq 20/40$   
176 using trial lenses, and fixation was controlled with gaze/blind spot automatic settings. Only  
177 reliable tests were included in our analysis, defined by fixation loss, false-negative, and false-  
178 positive rates <20%. Perimetric mean deviations (PMD), which contrast a participant's visual  
179 field against age-matched, visually intact controls, were calculated monocularly by a proprietary  
180 algorithm (Carl Zeiss Meditech), then averaged between eyes to generate a single composite

181 value for visual deficit size/severity in each patient. More negative PMD values indicated greater  
182 visual deficit size/severity over the central 54 deg of the visual field.

183

#### 184 **Statistical Analyses**

185 Mean NEI-VFQ subscale scores, composite scores, and Neuro10 scores were compared  
186 between CB patients and visually-intact controls using unpaired t-tests. Simple linear  
187 regressions were used to assess the linear relationships of time post-stroke, age, and PMD with  
188 NEI-VFQ and Neuro10 composite scores. Multiple linear regression analyses were used to  
189 determine the associations between outcomes — NEI-VFQ subscale scores, NEI-VFQ  
190 composite scores, and Neuro10 composite scores — and independent variables (i.e., time post-  
191 stroke, PMD, and age) in CB patients in the presence of other risk factors. Analyses were  
192 conducted using statistical software (R Studio Version 2023). Statistical significance was set at  
193  $p < 0.05$ .

194



## 195 Results

### 196 Characteristics of visual deficits

197 The present cohort of CB patients presented a wide range of visual deficit sizes and severity,  
198 with PMDs ranging from -19.3 to -1.5dB, with a mean of  $-9.9\pm 4.1$ dB. Examples of a small and  
199 large deficit are shown in **Fig. 1A**. Critically for subsequent analyses, PMD was not significantly  
200 correlated with patient age ( $r^2=0.047$ ,  $p=0.113$ ) or time-since-stroke ( $r^2=0.062$ ,  $p=0.065$ ), nor  
201 was there a significant correlation between time-since-stroke and patient age ( $r^2=0.066$ ,  
202  $p=0.162$ ).

203

### 204 Impact of occipital stroke on V-QoL

205 In CB patients, the mean NEI-VFQ composite score was  $68.2\pm 15.3$  and the mean Neuro10  
206 score was  $73.0\pm 15.8$ , both significantly lower than control participants, who scored  $93.1\pm 6.8$  on  
207 the NEI-VFQ and  $95.0\pm 5.0$  on the Neuro10 (**Fig. 1B**; **Table 1**). Individual NEI-VFQ subscales  
208 were impaired on 10/12 categories (all but General Health and Ocular Pain; **Table 1**, **Fig. 1C**) in  
209 CB patients, but interestingly, none were significantly correlated with PMD (**Supp. Fig. 1**).  
210 Differences between CB patients and controls were greatest for Driving, Peripheral Vision,  
211 Mental Health, and Role Difficulties (**Table 1**). With respect to driving, 2 CB patients reported  
212 that they stopped driving for non-vision related reasons. Per the NEI-VFQ scoring manual, a  
213 driving score could not be generated for these patients; therefore, they could not be included in  
214 further analysis. Of the remaining CB patients, approximately 53% (49/93) reported giving up  
215 driving due to their vision, generating a driving score of zero, while the rest continued to drive.

216

### 217 Relationship Between NEI-VFQ Subscale Scores

218 We used simple linear regressions to correlate subscale scores with one another. One of the  
219 strongest relationships occurred between scores for Distance Activities and Near Activities (**Fig.**  
220 **2A**). Driving was also significantly correlated with these two subscales (**Fig. 2B, C**), but its

221 strongest correlations were with Mental Health, Role Difficulties, and Dependency (**Fig. 2D-F**).  
222 Lastly, scores describing socioemotional functioning (Mental Health, Role Difficulties,  
223 Dependency, and Social Functioning) were most strongly intercorrelated with one another.  
224 Mental health was most significantly associated with Role Difficulties, Dependency, and Social  
225 Functioning (**Fig. 2G-I**).

226

### 227 **Evolution of QoL scores with time post-stroke**

228 In simple linear regressions, neither PMD nor age were significantly correlated with NEI-VFQ  
229 composite scores (**Figs. 3A-B**). PMD was also not correlated with Neuro10 composite scores  
230 (**Figs. 3C**), but patient age was (**Fig. 3D**). However, simple linear regressions showed both  
231 composite scores to increase with time post-stroke (**Figs. 3E, F**) - correlations that remained  
232 significant after adjusting for age and PMD with multiple linear regression analysis (**Table 2**). A  
233 one-month increase in time post-stroke increased the average NEI-VFQ and Neuro10  
234 composite scores by ~0.1 units each in this model (**Table 2**).

235 Two participants were enrolled >300 months post-stroke: their enrollment dates post-  
236 stroke were each more than 300 months longer than the mean enrollment time post-stroke (26.0  
237 months) and both more than 325 months longer than the median enrollment time post-stroke  
238 (9.1 months). To assess whether these two data points influenced the slope estimate in our  
239 linear regression models, i.e., whether they acted as statistical leverage points, we repeated the  
240 multivariate regression excluding these two patients; both the NEI-VFQ and Neuro10 composite  
241 scores still increased significantly with time post-stroke ( $p=0.034$  and  $p=0.0008$ , respectively).

242 Finally, adjusting for PMD and age, 7/12 NEI-VFQ subscale scores improved with  
243 increasing time post-stroke: General Health, General Vision, Distance Activities, Mental Health,  
244 Role Difficulties, Dependency, and Driving (**Table 2**), even when the analysis excluded  
245 participants who stopped driving post-stroke (“adjusted driving” score, **Table 2**). The remaining 5

246 subscale scores did not change significantly with time since stroke: Ocular Pain, Near Activities,  
247 Social Functioning, Color Vision, and Peripheral Vision.

## 248 **Discussion**

249 The present cross-sectional analysis of post-occipital stroke patients adds to the growing  
250 discussion regarding the impact of visual field deficits on vision-related quality of life. Ours is  
251 one of the first studies to include both subacute (<6 months post-stroke) and chronic (>6 months  
252 post-stroke) patients in the same analysis, while focusing solely on unilateral stroke sustained in  
253 adulthood. This allowed us to assess a wider range of times post-stroke than previous work.  
254 Moreover, not binning patients by deficit size or lesion age (Gall et al., 2010) allowed novel  
255 correlations to emerge between these parameters and V-QoL. Specifically, we uncovered that  
256 V-QoL appears to increase with time post-stroke, irrespective of deficit size or patient age.  
257 Subscale analyses provided key insights into the likely drivers of this unexpected relationship.

258

### 259 **Occipital stroke reduces vision-related QoL**

260 We compared V-QoL scores among our sample of CB patients to two reference groups of  
261 visually-intact controls — one for the NEI-VFQ and another for the Neuro10 supplement. The  
262 NEI-VFQ control group is referenced extensively in studies quantifying the impact of ophthalmic  
263 diseases on V-QoL (Cahill, Banks, Stinnett, & Toth, 2005; Clemons et al., 2008; Hariprasad et  
264 al., 2008; Ma et al., 2002; Schiffman, Jacobsen, & Whitcup, 2001). This group was well-matched  
265 in age to our sample of CB patients, who nonetheless had significantly lower NEI-VFQ  
266 composite scores. CB patients also scored lower than controls on the Neuro10 supplement,  
267 although the reference group for the latter was younger than our CB patients. Overall,  
268 reductions in both NEI-VFQ and Neuro10 composite scores confirmed that V-QoL was impaired  
269 in our cohort of CB stroke-only patients.

270 Notably, 24-2 binocular Humphrey PMD, an objective proxy for central visual deficit size  
271 and severity, failed to correlate with NEI-VFQ or Neuro10 composite scores when adjusting for  
272 age and time post-stroke. Subscale analyses revealed a similar lack of correlation between  
273 PMD and all NEI-VFQ subscales (**Supp. Fig. 1**), suggesting that CB patients' perceived

274 difficulty in visual and socioemotional functioning is not related to the objective severity or size  
275 of their central visual deficit. This finding contrasts somewhat with prior literature reporting  
276 improved V-QoL scores with increased central visual field sparing (Gall et al., 2010;  
277 Papageorgiou et al., 2007), and greater improvement in V-QoL with greater spontaneous  
278 improvement in deficit size up to 6 months post-stroke (Tharaldsen et al., 2020). Our results  
279 may instead reflect a greater contribution of other social functioning factors on V-QoL scores in  
280 the present cohort, or be due to our multivariate analyses, which accounted for both age and  
281 time since stroke.

282         One important consideration in the context of the present study is that while 24-2 HVF  
283 perimetry is the most commonly-used clinical tool for quantifying visual deficits in CB, it does not  
284 capture the entirety of the visual field, and may thus miss some of the deficit. In future studies,  
285 quantification and categorization (hemianopia, scotoma, degree of macular sparing, etc.) of the  
286 CB deficit with whole-field methods (e.g., Goldmann or automated kinetic perimetry) may  
287 address this problem and it is conceivable that they may yield stronger correlations with V-QoL  
288 than Humphrey perimetry. Finally, V-QoL in this patient population could be impacted by patient  
289 visual acuity. Presently, all patients were best-corrected to 20/40 or better, and foveal acuity is  
290 not thought to be impacted in homonymous hemianopia, which typically presents with normal  
291 foveal sensitivity (as was the case in all of our patients' HVFs). Finally, previous reports found  
292 no difference in V-QoL in occipital stroke patients when comparing patients with good vs poor  
293 central acuity (Gall et al., 2010).

294

### 295 **Subscale-specific impairments**

296 When investigating the impact of occipital stroke on subscales of the NEI-VFQ, CB patients  
297 scored significantly lower than age-matched controls for each subscale except for General  
298 Health and Ocular Pain, consistent with prior work (Mangione et al., 2001). The lack of  
299 impairment in these two subscales was unsurprising, as occipital stroke is not associated with

300 physical discomfort to the eye, and CB patients enrolled met stringent medical and functional  
301 criteria to participate in the studies analyzed (see Methods). In fact, our CB self-reported  
302 General Health scores were as good as those of healthy controls and suggest that differences  
303 in other subscales were due to the stroke's impact on vision, instead of other impairments seen  
304 in the general stroke population.

305 The observed impairments among CB patients for subscales describing visual ability  
306 (General Vision, Peripheral Vision, Near Activities, and Distance Activities) were expected, since  
307 homonymous hemianopia is characterized by deficits that often span large segments of the  
308 visual periphery. Impairments in socioemotional subscales (Mental Health, Role Difficulties,  
309 Dependency, and Social Functioning) may instead be related to post-stroke depression, which  
310 has been documented in up to half of sufferers within the first 5 years post-stroke (Ayerbe, Ayis,  
311 Crichton, Wolfe, & Rudd, 2014; Hackett & Pickles, 2014; Kim & Choi-Kwon, 2000). Impairments  
312 in Mental Health and related socioemotional subscales may also be associated with the reduced  
313 ability to drive. Driving was the subscale where CB patients scored most poorly compared to  
314 controls, with 53% reporting that they gave up driving entirely due to their eyesight. Driving  
315 cessation has also been associated with increased depressive symptoms in a general  
316 population of older adults (Ragland, Satariano, & MacLeod, 2005). This was confirmed here,  
317 with Driving scores most strongly correlated with Mental Health, Role Difficulties and  
318 Dependency scores, and driving, or lack thereof, may also be a determining factor in role  
319 fulfillment.

320 On-road testing found CB patients to have noticeable, but not intractable, driving deficits.  
321 Chronic CB patients have at-fault accident rates 2.6 times higher than the visually-intact  
322 population, motivating driving restrictions for hemianopic patients (McGwin, Wood, Huisingsh, &  
323 Owsley, 2016). However, on-road testing found that up to 82% of drivers with homonymous  
324 hemianopia committed no obvious errors while driving (Elgin et al., 2010), and when evaluators  
325 were masked to the participants' condition, 73% of hemianopic and 88% of quadrantopic

326 patients were deemed fit to drive (Wood et al., 2009). Given the large impact of driving on  
327 quality of life, evaluation for driving safety and rehabilitation may offer a simple and cost-  
328 effective method of improving CB patients' quality of life. Finally, we note that pass/fail results for  
329 on-road testing and simulator environments show good fidelity in CB patients (Ungewiss et al.,  
330 2018), suggesting that simulated tests could providing a good-fidelity, safe, naturalistic space for  
331 examination of CB driving ability (Bowers, 2016; Bowers, Mandel, Goldstein, & Peli, 2009).

332

### 333 **V-QoL increases naturally with time since stroke**

334 A key finding here was that V-QoL increases with time post-stroke, even when adjusting for age  
335 and PMD. Our multivariate analysis included a much larger range of post-stroke times (<1  
336 month to over 31 years) than any prior work (Gall et al., 2010; Gall et al., 2009; Papageorgiou et  
337 al., 2007). Improvement in health-related QoL with time has been previously reported in the  
338 general stroke population, with occipital stroke patients showing slower recovery than their  
339 visually-intact counterparts (Gall et al., 2010). A distinct possibility is that this slower rate of  
340 improvement is a feature of global QoL for CB patients, resulting from the lack of available  
341 rehabilitation compared to that for speech or motor impairments. Nonetheless, the gradual  
342 improvement in V-QoL over time offers hope for CB patients dealing with life changes in the  
343 early stages post-stroke.

344 To understand what aspects of visual functioning drove the observed larger V-QoL at  
345 later times post-stroke, we examined individual NEI-VFQ subscale scores, adjusting for age and  
346 PMD. Seven improved significantly over time: General Health, General Vision, Distance  
347 Activities, Mental Health, Role Difficulties, Dependency, and Driving. It is notable that these  
348 scores were significantly correlated with each other in our subscale analyses. As such, any of  
349 these categories may drive the observed *overall* improvement, enhancing other categories in  
350 the process. Alternatively, they may improve independently, or with some mixed amount of  
351 driving effects from specific subscales. The remaining five subscales (Ocular Pain, Near

352 Activities, Social Functioning, Color Vision, and Peripheral Vision) did not improve over time  
353 post stroke. Ocular Pain was not impacted by this stroke, leaving Near Activities, Social  
354 Functioning, Color Vision and Peripheral Vision as potential targets for rehabilitation and  
355 counseling.

356 In our earlier comparison with visually intact controls, we noted that Mental Health and  
357 Role Difficulties were among the most impaired subscales in CB patients, likely reflecting a loss  
358 of self-sufficiency and professional ability. Increased scores for Mental Health, Role Difficulties,  
359 and Dependency over time may reflect the gradual development of lifestyle adjustments that  
360 help patients contend with their visual impairment, and recover some self-sufficiency and  
361 professional functioning. Alternatively, patients may simply become accustomed to their deficit  
362 and “learn to live with it”, despite the burdens it imposes.

363 Finally, higher V-QoL scores at later times post-stroke do not negate the fact that as a  
364 cohort, CB patients remained impaired relative to controls in all subscales excepting Ocular  
365 Pain and General Health (**Fig. 1**). Thus, accelerating recovery or enhancing its magnitude may  
366 be critical for ultimately improving patient outcomes.

367

### 368 **Limitations**

369 A key limitation of the present study was an inability to assess V-QoL in the same patient, as it  
370 progressed over time. Instead, we relied upon the different times post-stroke across individuals  
371 to make inferences about V-QoL natural history. It is hoped that future studies will address this  
372 problem and rule out the possibility of a sampling bias within the CB population who volunteers  
373 for research studies such as ours, long after their stroke.

374 We should also note that differences in age may have confounded comparison of  
375 Neuro10 scores between CB patients and controls, since the reference group for those scores  
376 was significantly younger than our CB patients (Raphael et al., 2006). However, given the  
377 extreme degree of V-QoL impairment in CB evidenced by the NEI-VFQ, and its lack of



378 correlation with age, it is likely our observations would hold for the Neuro10, even with  
379 appropriately-matched controls.

380 Finally, although the NEI-VFQ has been used extensively to quantify V-QoL in CB  
381 patients, we note that it was originally designed for patients with ophthalmic disease (Gall et al.,  
382 2009). As such, it may not robustly capture all aspects of V-QoL that pertain to CB.  
383 Development and validation of a CB-specific questionnaire could significantly improve our  
384 understanding of this condition and its impact on daily life.

385

### 386 **Conclusions and importance of knowledge gained**

387 V-QoL is significantly reduced by occipital strokes sustained in adulthood. Neither deficit  
388 size/severity nor age were significant predictors of this reduction. However, our cross-sectional  
389 design and large range of times post-stroke revealed that both composite scores and some key,  
390 individual sub-scores to be greater at later *versus* earlier times post-stroke. This suggests a  
391 spontaneous increase in V-QoL with time, even after adjusting for patient age and deficit  
392 severity. These results provide new, potentially key information for patients, clinicians and  
393 researchers as to the main drivers of V-QoL after occipital stroke. It is now possible to describe  
394 what changes patients might expect as they progress in their stroke recovery. Just as  
395 importantly, it alerts the field to the fact that V-QoL may improve spontaneously after occipital  
396 stroke, a trend against which vision restoration therapies in this patient population should be  
397 measured in order to assess their true impact.

398 **Figure legends**

399 **Figure 1. A.** Sample magnetic resonance images (T1) of 2 CB patients, whose left (OS) and  
400 right (OD) eye Humphrey visual fields (HVF) are shown adjacently. For the brain images,  
401 radiological convention is used, with the right brain hemisphere (R) on image left. White arrows  
402 on enlargements of the regions inside the boxes point to lesion site(s) in the occipital lobe of  
403 each patient. On HVFs, black shading denotes a sensitivity of 0 dB, whereas light stippling  
404 indicates higher visual sensitivities. Average, binocular (OU) PMDs are indicated for each  
405 patient. Note that the larger brain lesion in CB03 gives rise to a larger area of HVF defect and  
406 more negative PMD, than the smaller brain lesion in CB76. **B.** Mean NEI-VFQ and Neuro10  
407 composite scores comparing the present cohort of CB patients with previously-published  
408 controls (Mangione et al., 2001; Raphael et al., 2006). Mean patient age in our CB cohort did  
409 not differ significantly. Controls attained significantly higher composite scores than CB patients  
410 on both measures. **C.** Plot of individual NEI-VFQ subscale scores CB patients and the same  
411 controls whose composite scores are shown in B. Unsurprisingly, controls scored higher for  
412 every subscale except for general health ( $p=0.480$ ) and ocular pain ( $p=0.112$ ). Scores  
413 evaluating visual functioning and socioemotional functioning are outlined, with “driving” – the  
414 most severely affected subscale - separating these two major categories. Error bars in B and C  
415 = standard errors of the mean. \*  $p<0.001$ .

416  
417 **Figure 2. Significant inter-correlations between key visual functioning and**  
418 **socioemotional subscales of the NEI-VFQ.** Plots of one subscale score against another with  
419 each data point denoting a single CB patient. **A.** Simple regression analysis showed Distance  
420 Activities to be correlated significantly and positively with Near Activities. **B.** Similarly, Driving  
421 correlated significantly and positively with Distance Activities. **C.** Driving correlated significantly  
422 and positively with Near Activities. **D.** Driving correlated significantly and positively with Mental  
423 Health. **E.** Driving correlated significantly and positively with Role Difficulties. **F.** Driving

424 correlated significantly and positively with Dependency. **G.** Mental Health correlated significantly  
425 and positively with Dependency. **H.** Mental Health correlated significantly and positively with  
426 Social Functioning. **I.** Mental Health correlated significantly and positively with Role Difficulties.

427

428 **Figure 3. Simple linear regressions correlating age, PMD, and time post stroke**  
429 **individually with NEI-VFQ and Neuro10 composite scores.** Plots of composite scores  
430 against PMD, age and time post-stroke, with each data point denoting individual patients. PMD  
431 was not significantly correlated with NEI-VFQ composite score **(A)** or Neuro10 composite score  
432 **(B)**. Age was not significantly correlated with NEI-VFQ composite score **(C)**, but Neuro10  
433 composite score increased significantly with age **(D)**. Both NEI-VFQ composite score **(E)** and  
434 Neuro10 score **(F)** increased significantly with time post-stroke – relationships that were  
435 maintained after conducting multivariate regression analyses that considered PMD and age  
436 (see Table 2 for details).

## References

- 437  
438 Ayerbe, L., Ayis, S. A., Crichton, S., Wolfe, C. D., & Rudd, A. G. (2014). Natural history, predictors  
439 and associated outcomes of anxiety up to 10 years after stroke: the South London Stroke  
440 Register. *Age Ageing*, *43*(4), 542-547. doi:10.1093/ageing/aft208  
441
- 442 Bowers, A. R. (2016). Driving with homonymous visual field loss: a review of the literature.  
443 *Clinical & experimental optometry*, *99*(5), 402-418.  
444 doi:<https://doi.org/10.1111/cxo.12425>  
445
- 446 Bowers, A. R., Mandel, A. J., Goldstein, R. B., & Peli, E. (2009). Driving with hemianopia, I:  
447 Detection performance in a driving simulator. *Invest Ophthalmol Vis Sci*, *50*(11), 5137-  
448 5147. doi:10.1167/iovs.09-3799  
449
- 450 Cahill, M. T., Banks, A. D., Stinnett, S. S., & Toth, C. A. (2005). Vision-related quality of life in  
451 patients with bilateral severe age-related macular degeneration. *Ophthalmology*, *112*(1),  
452 152-158. doi:10.1016/j.optha.2004.06.036  
453
- 454 Chen, C. S., Lee, A. W., Clarke, G., Hayes, A., George, S., Vincent, R., . . . Crotty, M. (2009). Vision-  
455 Related Quality of Life in Patients with Complete Homonymous Hemianopia Post Stroke.  
456 *Topics in Stroke Rehabilitation*, *16*(6), 445-453. doi:10.1310/tsr1606-445  
457
- 458 Clemons, T. E., Gillies, M. C., Chew, E. Y., Bird, A. C., Peto, T., Figueroa, M., . . . Macular  
459 Telangiectasia Research, G. (2008). The National Eye Institute Visual Function  
460 Questionnaire in the Macular Telangiectasia (MacTel) Project. *Invest Ophthalmol Vis Sci*,  
461 *49*(10), 4340-4346. doi:10.1167/iovs.08-1749  
462
- 463 Dombrov, M. L., Sandok, B. A., & Basford, J. R. (1986). Rehabilitation for stroke: a review. *Stroke*,  
464 *17*(3), 363-369. doi:10.1161/01.str.17.3.363  
465
- 466 Elgin, J., McGwin, G., Wood, J. M., Vaphiades, M. S., Braswell, R. A., DeCarlo, D. K., . . . Owsley, C.  
467 (2010). Evaluation of On-Road Driving in Persons with Hemianopia and Quadrantanopia.  
468 *Am J Occup Ther*, *64*(2), 268-278. doi:10.5014/ajot.64.2.268  
469
- 470 Gall, C., Franke, G. H., & Sabel, B. A. (2010). Vision-related quality of life in first stroke patients  
471 with homonymous visual field defects. *Health and Quality of Life Outcomes*, *8*(1), 33.  
472 doi:10.1186/1477-7525-8-33  
473
- 474 Gall, C., Lucklum, J., Sabel, B. A., & Franke, G. H. (2009). Vision- and health-related quality of life  
475 in patients with visual field loss after postchiasmatic lesions. *Invest Ophthalmol Vis Sci*,  
476 *50*(6), 2765-2776. doi:10.1167/iovs.08-2519  
477
- 478 George, S., Hayes, A., Chen, C., & Crotty, M. (2011). Are vision-specific quality of life  
479 questionnaires important in assessing rehabilitation for patients with hemianopia post  
480 stroke? *Top Stroke Rehabil*, *18*(4), 394-401. doi:10.1310/tsr1804-394

481  
482 Gilhotra, J. S., Mitchell, P., Healey, P. R., Cumming, R. G., & Currie, J. (2002). Homonymous visual  
483 field defects and stroke in an older population. *Stroke*, *33*(10), 2417-2420.  
484 doi:10.1161/01.str.0000037647.10414.d2  
485  
486 Gray, C. S., French, J. M., Bates, D., Cartlidge, N. E., Venables, G. S., & James, O. F. (1989).  
487 Recovery of visual fields in acute stroke: homonymous hemianopia associated with  
488 adverse prognosis. *Age Ageing*, *18*(6), 419-421. doi:10.1093/ageing/18.6.419  
489  
490 Hackett, M. L., & Pickles, K. (2014). Part I: frequency of depression after stroke: an updated  
491 systematic review and meta-analysis of observational studies. *Int J Stroke*, *9*(8), 1017-  
492 1025. doi:10.1111/ijvs.12357  
493  
494 Hariprasad, S. M., Mieler, W. F., Grassi, M., Green, J. L., Jager, R. D., & Miller, L. (2008). Vision-  
495 related quality of life in patients with diabetic macular oedema. *Br J Ophthalmol*, *92*(1),  
496 89-92. doi:10.1136/bjo.2007.122416  
497  
498 Horton, J. C. (2005a). Disappointing results from Nova Vision's visual restoration therapy. *Br J*  
499 *Ophthalmol*, *89*(1), 1-2. doi:10.1136/bjo.2004.058214  
500  
501 Horton, J. C. (2005b). Vision restoration therapy: confounded by eye movements. *Br J*  
502 *Ophthalmol*, *89*(7), 792-794. doi:10.1136/bjo.2005.072967  
503  
504 Jones, S. A., & Shinton, R. A. (2006). Improving outcome in stroke patients with visual problems.  
505 *Age Ageing*, *35*(6), 560-565. doi:10.1093/ageing/afl074  
506  
507 Jongbloed, L. (1986). Prediction of function after stroke: a critical review. *Stroke*, *17*(4), 765-776.  
508 doi:10.1161/01.str.17.4.765  
509  
510 Kim, J. S., & Choi-Kwon, S. (2000). Poststroke depression and emotional incontinence:  
511 correlation with lesion location. *Neurology*, *54*(9), 1805-1810.  
512 doi:10.1212/wnl.54.9.1805  
513  
514 Liu, K. P. Y., Hanly, J., Fahey, P., Fong, S. S. M., & Bye, R. (2019). A Systematic Review and Meta-  
515 Analysis of Rehabilitative Interventions for Unilateral Spatial Neglect and Hemianopia  
516 Poststroke From 2006 Through 2016. *Archives of Physical Medicine and Rehabilitation*,  
517 *100*(5), 956-979. doi:<https://doi.org/10.1016/j.apmr.2018.05.037>  
518  
519 Ma, S. L., Shea, J. A., Galetta, S. L., Jacobs, D. A., Markowitz, C. E., Maguire, M. G., & Balcer, L. J.  
520 (2002). Self-reported visual dysfunction in multiple sclerosis: new data from the VFQ-25  
521 and development of an MS-specific vision questionnaire. *Am J Ophthalmol*, *133*(5), 686-  
522 692. doi:10.1016/s0002-9394(02)01337-5  
523

- 524 Mangione, C. M. (2000). The National Eye Institute 25-Item Visual Functioning Questionnaire  
525 (VFQ-25).  
526
- 527 Mangione, C. M., Lee, P. P., Gutierrez, P. R., Spritzer, K., Berry, S., & Hays, R. D. (2001).  
528 Development of the 25-item National Eye Institute Visual Function Questionnaire. *Arch*  
529 *Ophthalmol*, *119*(7), 1050-1058. doi:10.1001/archophth.119.7.1050  
530
- 531 Mangione, C. M., Lee, P. P., Pitts, J., Gutierrez, P., Berry, S., & Hays, R. D. (1998). Psychometric  
532 properties of the National Eye Institute Visual Function Questionnaire (NEI-VFQ). NEI-  
533 VFQ Field Test Investigators. *Arch Ophthalmol*, *116*(11), 1496-1504.  
534 doi:10.1001/archophth.116.11.1496  
535
- 536 McGwin, G., Wood, J. M., Huisingh, C., & Owsley, C. (2016). Motor Vehicle Collision Involvement  
537 among Persons with Hemianopia and Quadrantanopia. *Geriatrics*, *1*(19).  
538 doi:10.3390/geriatrics1030019  
539
- 540 Melnick, M. D., Tadin, D., & Huxlin, K. R. (2016). Relearning to See in Cortical Blindness. *The*  
541 *Neuroscientist*, *22*(2), 199-212. doi:10.1177/1073858415621035  
542
- 543 Papageorgiou, E., Hardiess, G., Schaeffel, F., Wiethoelter, H., Karnath, H. O., Mallot, H., . . .  
544 Schiefer, U. (2007). Assessment of vision-related quality of life in patients with  
545 homonymous visual field defects. *Graefes Arch Clin Exp Ophthalmol*, *245*(12), 1749-  
546 1758. doi:10.1007/s00417-007-0644-z  
547
- 548 Plant, G. T. (2005). A work out for hemianopia. *Br J Ophthalmol*, *89*(1), 2.  
549 doi:10.1136/bjo.2004.053173  
550
- 551 Pollock, A., Hazelton, C., Henderson, C. A., Angilley, J., Dhillon, B., Langhorne, P., . . . Shahani, U.  
552 (2012). Interventions for visual field defects in patients with stroke. *Stroke*, *43*(4), e37-  
553 e38. doi:10.1161/strokeaha.111.639815  
554
- 555 Pollock, A., Hazelton, C., Henderson, C. A., Angilley, J., Dhillon, B., Langhorne, P., . . . Shahani, U.  
556 (2011). Interventions for visual field defects in patients with stroke. *Cochrane Database*  
557 *Syst Rev*(10), CD008388. doi:10.1002/14651858.CD008388.pub2  
558
- 559 Pollock, A., Hazelton, C., Rowe, F. J., Jonuscheit, S., Kernohan, A., Angilley, J., . . . Campbell, P.  
560 (2019). Interventions for visual field defects in people with stroke. *Cochrane Database*  
561 *Syst Rev*, *5*(5), CD008388. doi:10.1002/14651858.CD008388.pub3  
562
- 563 Ragland, D. R., Satariano, W. A., & MacLeod, K. E. (2005). Driving cessation and increased  
564 depressive symptoms. *J Gerontol A Biol Sci Med Sci*, *60*(3), 399-403.  
565 doi:10.1093/gerona/60.3.399  
566

- 567 Raphael, B. A., Galetta, K. M., Jacobs, D. A., Markowitz, C. E., Liu, G. T., Nano-Schiavi, M. L., . . .  
568 Balcer, L. J. (2006). Validation and test characteristics of a 10-item neuro-ophthalmic  
569 supplement to the NEI-VFQ-25. *Am J Ophthalmol*, *142*(6), 1026-1035.  
570 doi:10.1016/j.ajo.2006.06.060  
571
- 572 Reinhard, J., Schreiber, A., Schiefer, U., Kasten, E., Sabel, B. A., Kenkel, S., . . . Trauzettel-Klosinski,  
573 S. (2005). Does visual restitution training change absolute homonymous visual field  
574 defects? A fundus controlled study. *Br J Ophthalmol*, *89*(1), 30-35.  
575 doi:10.1136/bjo.2003.040543  
576
- 577 Rowe, F. J. (2013). Care provision and unmet need for post stroke visual impairment - Final  
578 Report.  
579
- 580 Rowe, F. J., Hepworth, L. R., Conroy, E. J., Rainford, N. E. A., Bedson, E., Drummond, A., . . .  
581 Sackley, C. (2019). Visual Function Questionnaire as an outcome measure for  
582 homonymous hemianopia: subscales and supplementary questions, analysis from the  
583 VISION trial. *Eye (Lond)*, *33*(9), 1485-1493. doi:10.1038/s41433-019-0441-z  
584
- 585 Sahraie, A. (2007). Induced visual sensitivity changes in chronic hemianopia. *Current Opinion in*  
586 *Neurobiology*, *20*, 661-666.  
587
- 588 Saionz, E. L., Busza, A., & Huxlin, K. R. (2022). Rehabilitation of visual perception in cortical  
589 blindness. *Handb Clin Neurol*, *184*, 357-373. doi:10.1016/B978-0-12-819410-2.00030-8  
590
- 591 Saionz, E. L., Feldon, S. E., & Huxlin, K. R. (2020). Rehabilitation of cortically-induced visual field  
592 loss. *Current Opinion in Neurology*, *34*, 67-74.  
593
- 594 Schiffman, R. M., Jacobsen, G., & Whitcup, S. M. (2001). Visual functioning and general health  
595 status in patients with uveitis. *Arch Ophthalmol*, *119*(6), 841-849.  
596 doi:10.1001/archoph.119.6.841  
597
- 598 Tharaldsen, A. R., Sand, K. M., Dalen, I., Wilhelmsen, G., Naess, H., Midelfart, A., . . . Group, t.  
599 N.-O. R. (2020). Vision-related quality of life in patients with occipital stroke. *Acta Neurol*  
600 *Scand*, *141*, 509-518.  
601
- 602 Ungewiss, J., Kübler, T., Sippel, K., Aehling, K., Heister, M., Rosenstiel, W., . . . Papageorgiou, E.  
603 (2018). Agreement of driving simulator and on-road driving performance in patients  
604 with binocular visual field loss. *Graefe's Archive for Clinical and Experimental*  
605 *Ophthalmology*, *256*(12), 2429-2435. doi:10.1007/s00417-018-4148-9  
606
- 607 Wood, J. M., McGwin, G., Elgin, J., Vaphiades, M. S., Braswell, R. A., DeCarlo, D. K., . . . Owsley, C.  
608 (2009). On-Road Driving Performance by Persons with Hemianopia and Quadrantanopia.  
609 *Invest Ophthalmol Vis Sci*, *50*(2), 577-585. doi:10.1167/iovs.08-2506  
610

611 Zhang, X., Kedar, S., Lynn, M. J., Newman, N. J., & Biousse, V. (2006). Natural history of  
612 homonymous hemianopia. *Neurology*, *66*(6), 901-905.  
613 doi:10.1212/01.wnl.0000203338.54323.22  
614  
615



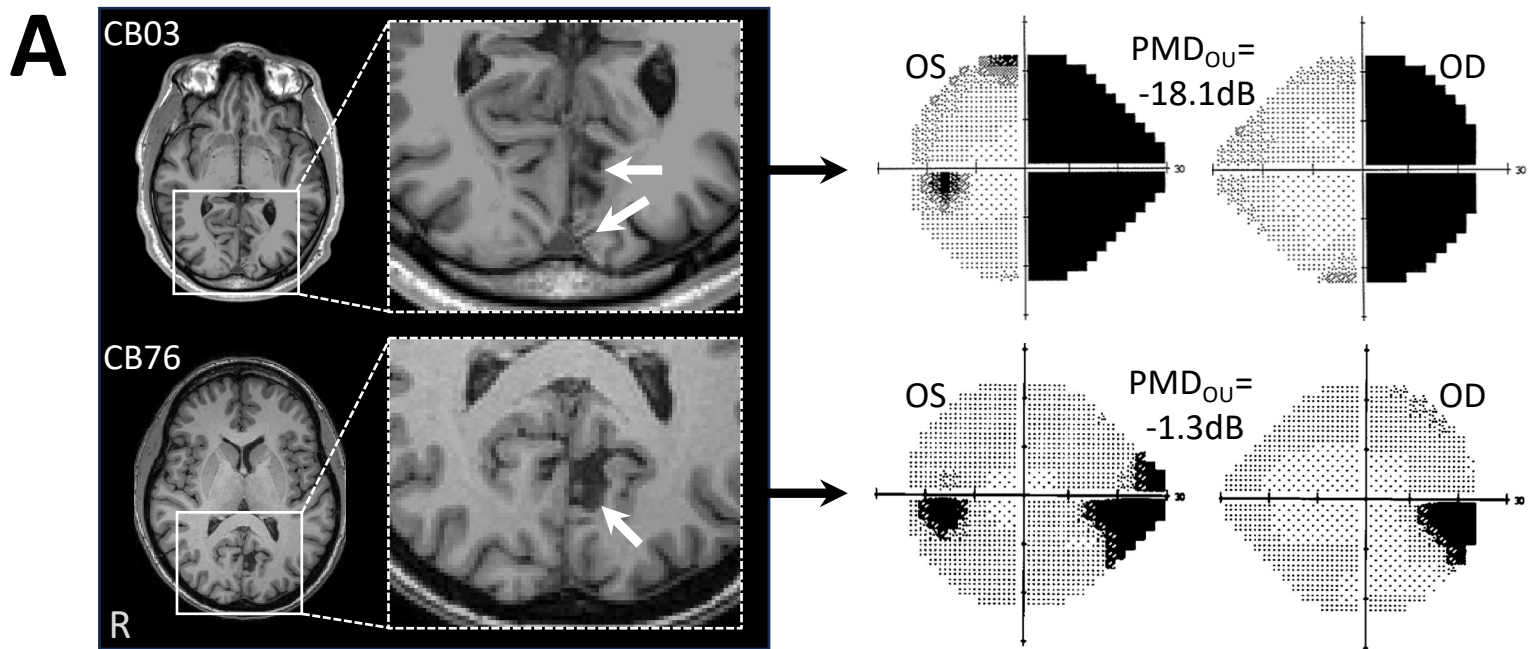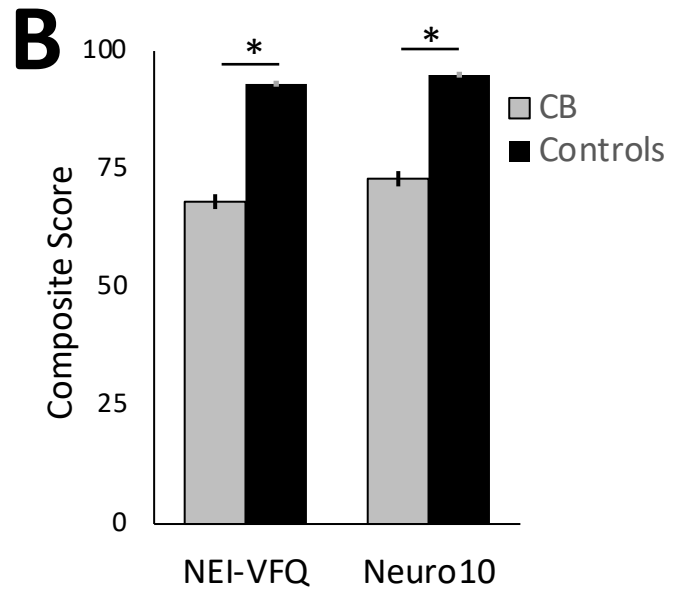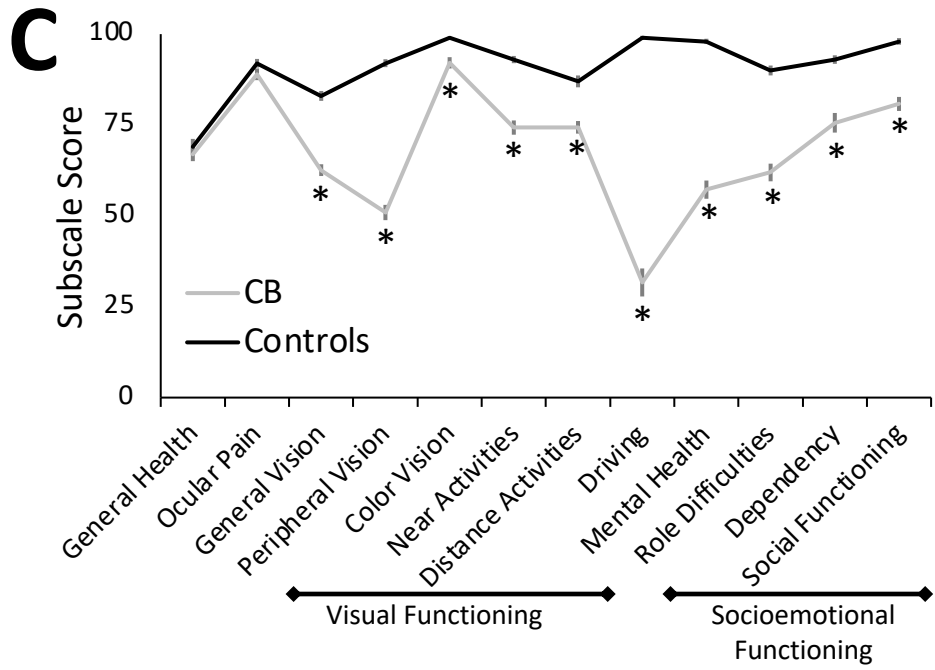

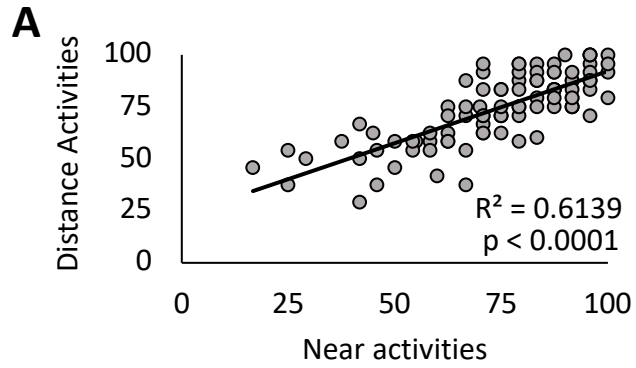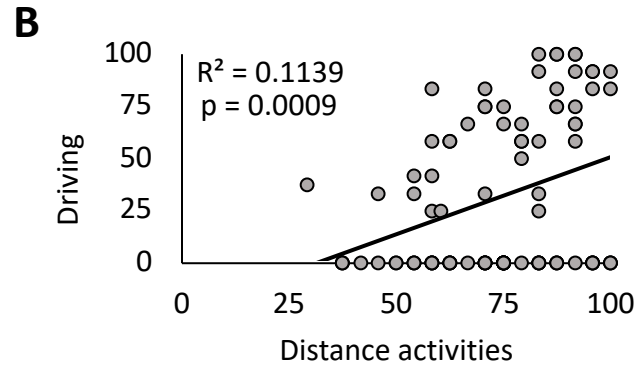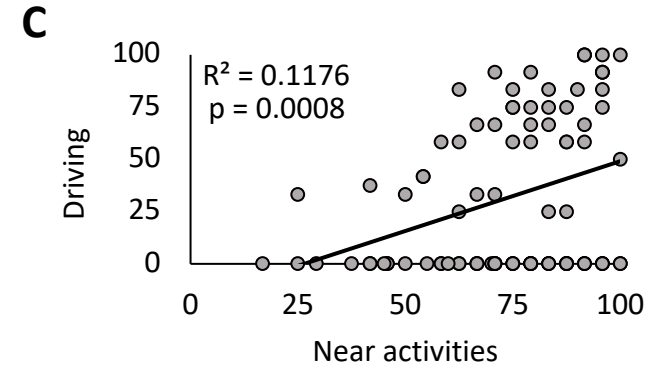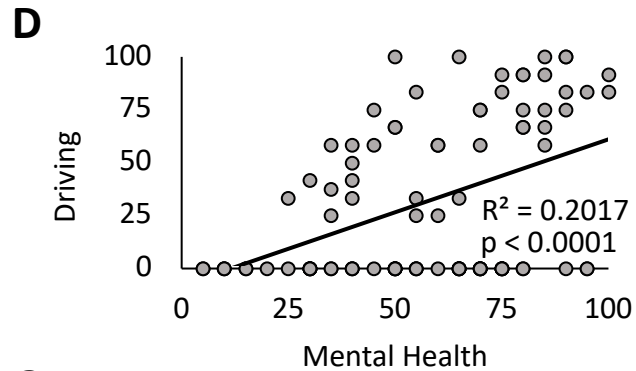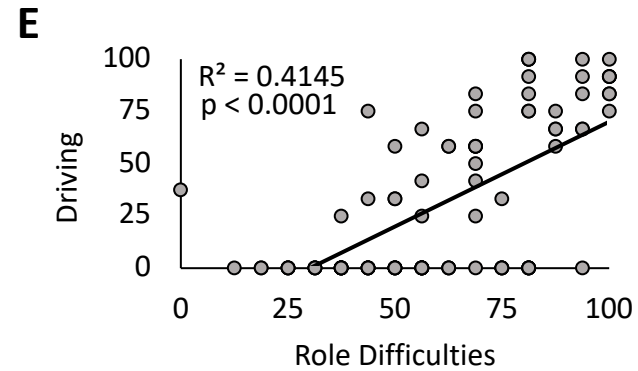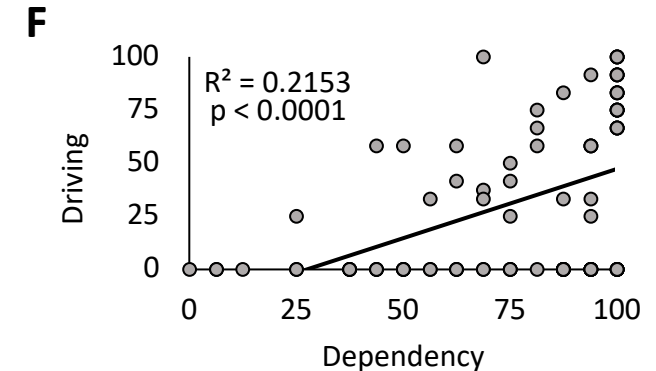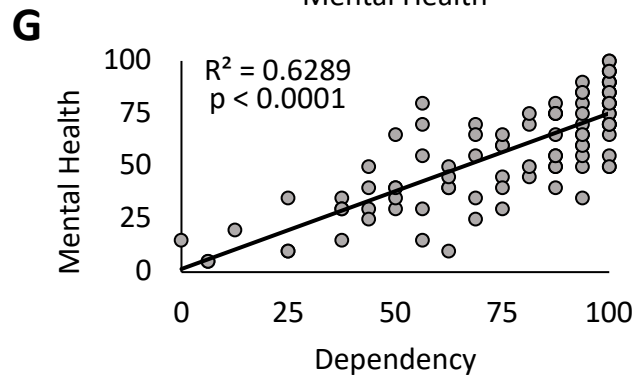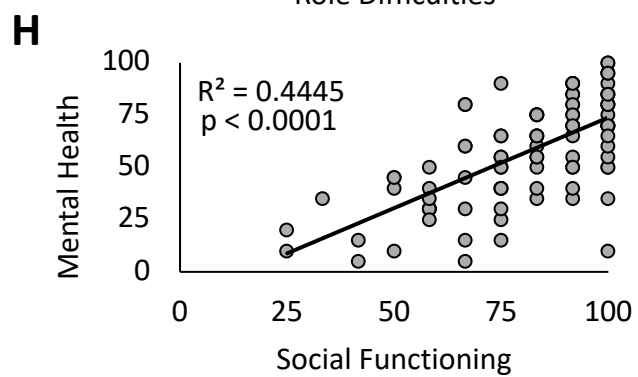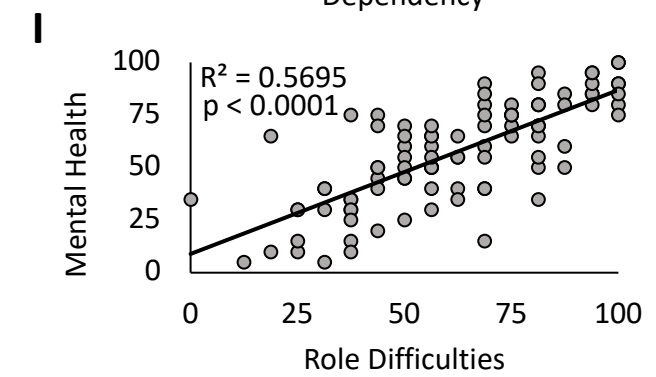

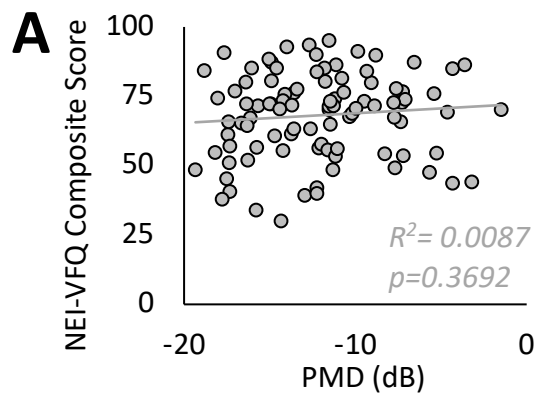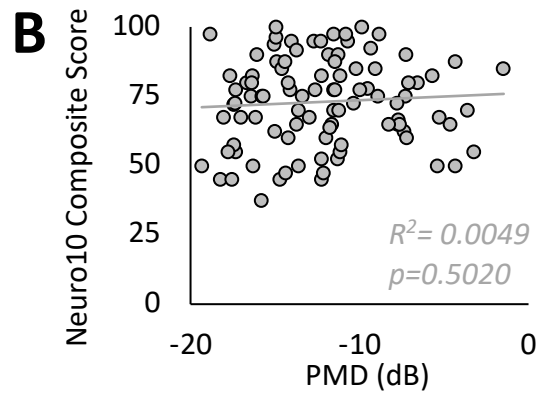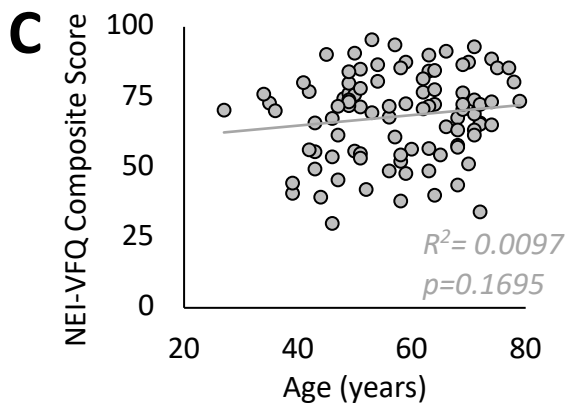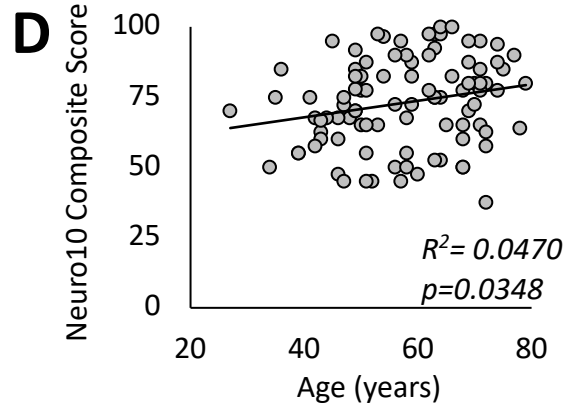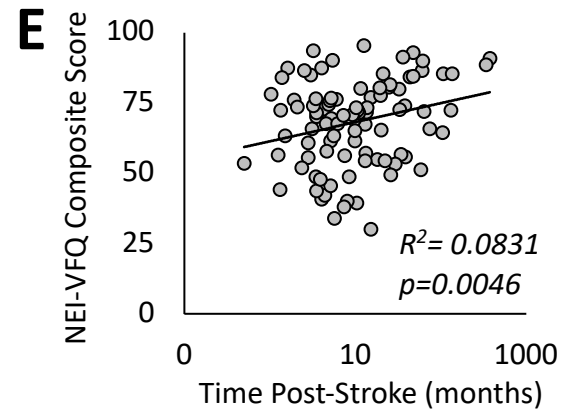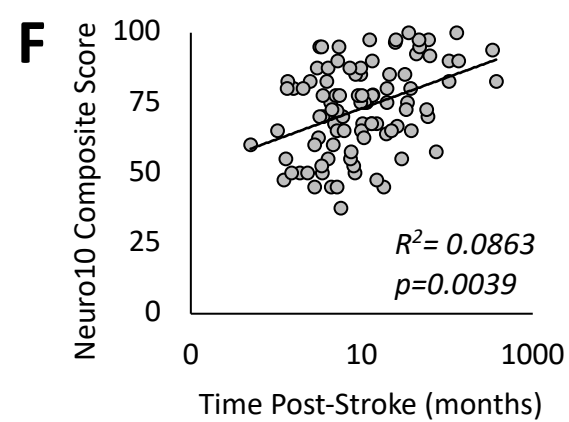

| Scale                   | CB        | Control   | t     | df  | p         |
|-------------------------|-----------|-----------|-------|-----|-----------|
| NEI-VFQ Composite Score | 68.2±15.3 | 93.1±5.0  | -16   | 216 | < 0.0001* |
| General Health          | 66.9±18.5 | 69.0±24.0 | -0.7  | 216 | 0.48      |
| General Vision          | 62.6±15.8 | 83.0±15.0 | -9.7  | 216 | < 0.0001* |
| Ocular Pain             | 88.9±15.7 | 92.0±13.0 | -1.6  | 216 | 0.112     |
| Near Activities         | 74.3±19.1 | 93.0±11.0 | -9.6  | 216 | < 0.0001* |
| Distance Activities     | 74.4±16.9 | 87.0±18.0 | -11.6 | 216 | < 0.0001* |
| Social Functioning      | 80.8±18.8 | 98.0±10.0 | -8.7  | 216 | < 0.0001* |
| Mental Health           | 57.2±24.4 | 98.0±8.0  | -13   | 216 | < 0.0001* |
| Role Difficulties       | 61.9±23.7 | 90.0±15.0 | -10.7 | 216 | < 0.0001* |
| Dependency              | 75.6±26.3 | 93.0±13.0 | -6.4  | 216 | < 0.0001* |
| Driving                 | 31.7±37.1 | 99.0±6.0  | -19.7 | 214 | < 0.0001* |
| Color Vision            | 92.1±15.2 | 99.0±3.0  | -4.9  | 216 | < 0.0001* |
| Peripheral Vision       | 50.9±20.5 | 92.0±12.0 | -18.5 | 216 | < 0.0001* |
| Neuro10 Composite Score | 73.0±15.8 | 95.0±5.0  | -10.9 | 159 | < 0.0001* |

**Table 1. Descriptive statistics contrasting NEI-VFQ and Neuro10 scores between CB patients and visually-intact controls.** Control data were previously reported controls (Mangione et al., 2001; Raphael et al., 2006). \* denotes significance.

| <b>Scale</b>            | <b>Slope</b> | <b>Std Error</b> | <b>t</b> | <b>p</b> |
|-------------------------|--------------|------------------|----------|----------|
| NEI-VFQ Composite Score | 0.09         | 0.03             | 3.01     | 0.003*   |
| General Health          | 0.08         | 0.03             | 2.41     | 0.018*   |
| General Vision          | 0.1          | 0.03             | 3.69     | 0.0004*  |
| Ocular Pain             | -0.02        | 0.03             | -0.74    | 0.459    |
| Near Activities         | 0.06         | 0.04             | 1.59     | 0.116    |
| Distance Activities     | 0.08         | 0.03             | 2.5      | 0.014*   |
| Social Functioning      | 0.04         | 0.03             | 1.28     | 0.203    |
| Mental Health           | 0.14         | 0.04             | 3.08     | 0.003*   |
| Role Difficulties       | 0.11         | 0.04             | 2.5      | 0.014*   |
| Dependency              | 0.11         | 0.05             | 2.29     | 0.025*   |
| Driving                 | 0.19         | 0.07             | 2.71     | 0.008*   |
| Adjusted Driving        | 0.11         | 0.05             | 2.21     | 0.033*   |
| Color Vision            | 0.04         | 0.03             | 1.4      | 0.165    |
| Peripheral Vision       | 0.07         | 0.04             | 1.88     | 0.064    |
| Neuro10 Composite Score | 0.08         | 0.03             | 2.94     | 0.004*   |

**Table 2. Multivariate regression analyses of QoL scores and time post-stroke, adjusted for PMD and age. \* indicates significance.**
